# Supplementary material for: Nitrogen-Doped Carbon Quantum Dots for Biosensing Applications: The Effect of the Thermal Treatments on Electrochemical and Optical Properties
Source: MDPI journal article supplement (doi:10.3390/molecules28010072), 2022-12-22
Supplement: s1 [file s1]

# **Nitrogen-doped Carbon Quantum Dots for Biosensing applications: The Effect of The Thermal Treatments on Electrochemical and Optical Properties**

Francesco Ghezzi <sup>1</sup>, Riccardo Donnini <sup>2</sup>, Antonio Sansonetti <sup>3</sup>, Umberto Giovanella <sup>4</sup>, Barbara La Ferla <sup>5</sup>, Barbara Vercelli <sup>2,\*</sup>

<sup>1</sup> *Istituto per la Scienza e la Tecnologia dei Plasmi, CNR-ISTP, Via Cozzi 53, 20125 Milano (Italy).*

<sup>2</sup> *Istituto di Chimica della Materia Condensata e di Tecnologie per l'Energia, CNR-ICMATE, Via Cozzi 53, 20125 Milano (Italy).*

<sup>3</sup> *Istituto di Scienze del Patrimonio Culturale, CNR-ISPC, Via Cozzi 53, 20125 Milano (Italy).*

<sup>4</sup> *Istituto di Scienze e Tecnologie Chimiche 'Giulio Natta', CNR-SCITEC, Via Alfonso Corti 12, 20133 Milano (Italy)*

<sup>5</sup> *Dipartimento di Biotecnologie e Bioscienze, Università degli Studi di Milano-Bicocca, Piazza della Scienza 2, 20126 Milano (Italy)*

## **Contents**

|                  |                 |
|------------------|-----------------|
| <b>Table S1</b>  | <b>page S02</b> |
| <b>Figure S1</b> | <b>page S03</b> |
| <b>Figure S2</b> | <b>page S04</b> |
| <b>Figure S3</b> | <b>page S05</b> |

**Table S1** – Fitting parameters, intercept ( $E_i$ ) and slope, of the peak potentials versus pH of N-CQDs-160-8.

| <b>pH range</b> | <b><math>E_{i(ox)}/V</math></b> | <b>Slope/mV</b> | <b><math>E_{i(red)}/V</math></b> | <b>Slope/mV</b> |
|-----------------|---------------------------------|-----------------|----------------------------------|-----------------|
| <b>1-3</b>      | 0.43                            | -55             | 0.02                             | -61             |
| <b>5-12</b>     | 0.17                            | 25              | 0.2                              | -126            |

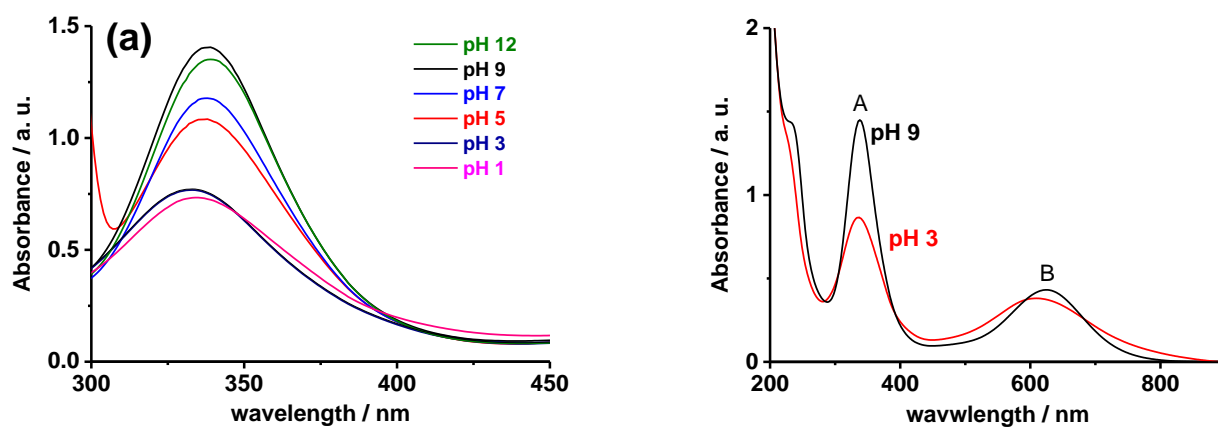

**Figure S1** – (a) UV-vis spectra of 0.5 mg ml<sup>-1</sup> N-CQDs-160-8 solutions in different pH buffers. (b) UV-vis spectrum of 0.5 mg ml<sup>-1</sup> N-CQDs-160-8 solutions at the pH range 3 (red line) and 9 (black line).

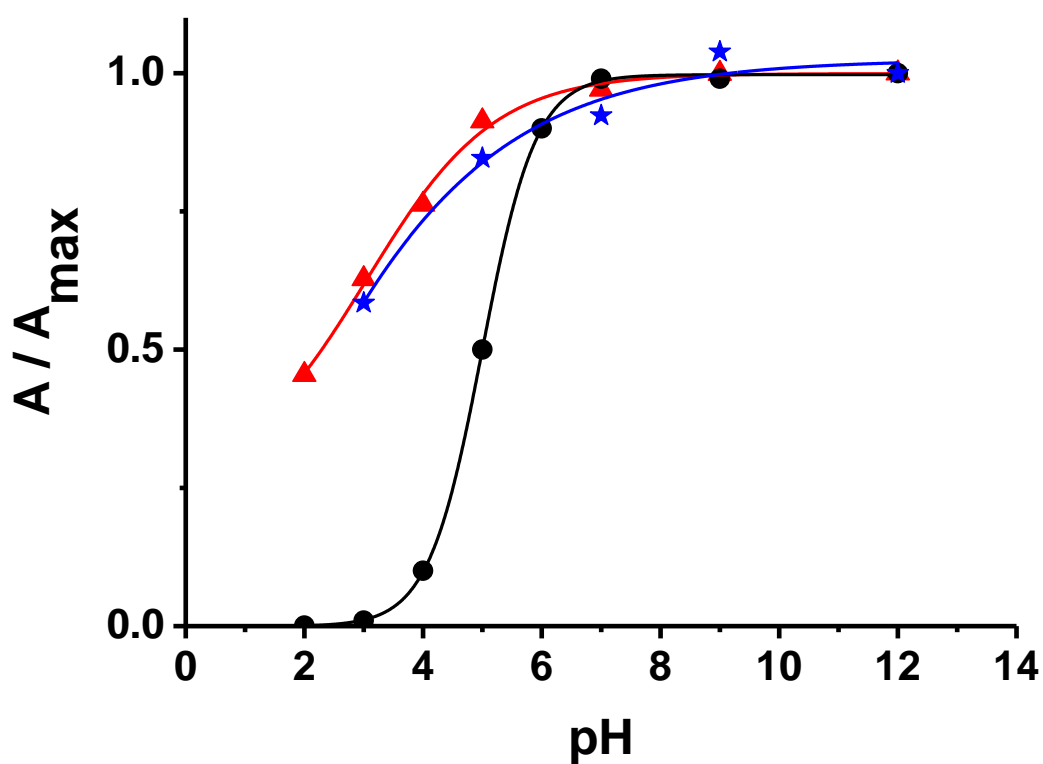

**Figure S2** – Dependence vs pH of the un-protonated pyridine N-atom ( $\frac{A}{A_{max}}$ ) of samples N-CQDs-160-1 (red line, triangles), N-CQDs-160-8 (blue line, stars) and theoretical curve (black line, dots).

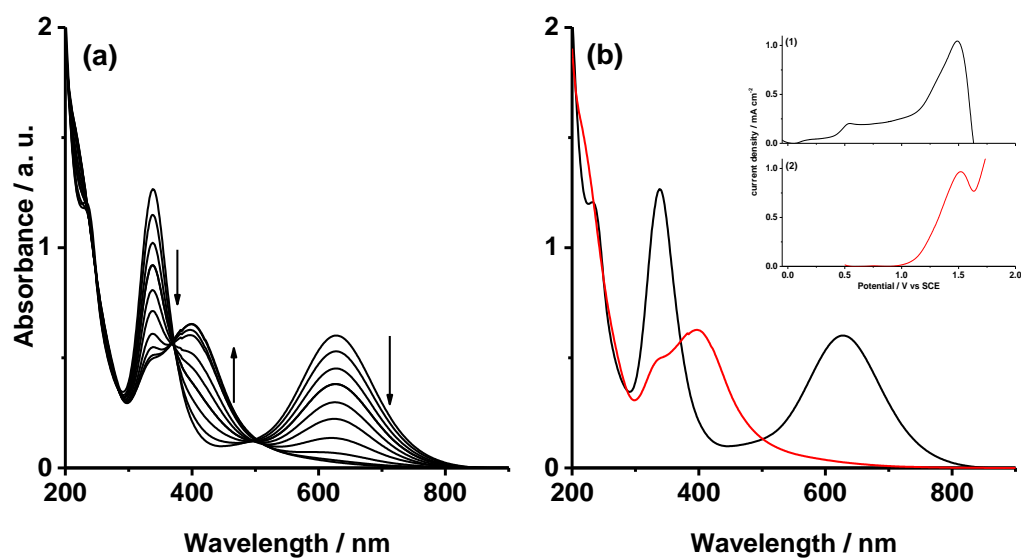

**Figure S3** – a) UV-vis spectra of 0.5 mg ml<sup>-1</sup> N-CQDs-160-8 solution at increasing charge. Applied potential 0.8 V vs SCE. Electrolytic medium 0.1 M NaClO<sub>4</sub>/pH 9 buffer. b) UV-vis spectrum of N-CQDs-160-8 (black line) and of NO-CQDs-160-8 (red line). Inset: single sweep cyclic voltammograms of N-CQDs-160-8 (1) and NO-CQDs-160-8 (2).
